# Supplementary material for: Social synchronisation of brain activity by eye-contact
Source: Research Square preprint supplement (doi:10.21203/rs.3.rs-654192/v1), 2021-07-12
Supplement: Supplementary file 1 [file 35dd4f21741a12f10979d8ef.docx]

***Supplementary Information***

***Social synchronisation of brain activity by eye-contact***

Luft, CDBL, Zioga, I, Giannopoulos, A, Di Bona, G, Binetti, N, Civilini, A, Latora, V, Mareschal, I

***Behavioural Analysis S1***

***Tone-reproduction durations and correlations***

We compared participants’ gaze durations during tone reproduction. Specifically, we calculated the mean tone-reproduction duration of each participant (i.e. offset minus onset of eye movement during the tone reproduction ), separately in each task and in each trial condition. Gaze durations of <0.5 sec or >4 sec were excluded from all analyses. Out of a total of 112 participants (56 pairs), 2 participants were excluded as they had less than 5 trials in at least one of the conditions (due to problems on the eye-tracking calibration).

*Eye-contact (EC) vs. control (CTL):* we investigated whether the tone-reproduction duration of one participant would be influenced by their pair by conducting a 2 *(task: EC vs. CTL)* x 2 *(tone duration: short vs. long)* x 2 *(pair duration: same vs. different)* repeated measures ANOVA. Note that *same duration* corresponds to the trials when both partners heard either a short or a long tone, whereas *different duration* corresponds to trials when one partner heard a short tone and the other partner heard a long tone. We observed a significant main effect of *tone duration* (*F*(1,109) = 574.766, *p* < .001, *η2* = .841), long tones induced longer gaze durations than short tones. There was also a main effect of *task* (*F*(1,109) = 66.714, *p* < .001, *η2* = .380), with longer gaze times in the control compared to the eye-contact task condition. Results also revealed a significant interaction between *tone duration* and *task* (*F*(1,109) = 12.498, *p* = .001, *η2* = .103). Planned contrasts confirmed that participants gazed longer during long compared to short tones in both tasks (*p <* .001), but that they gazed longer in CTL compared to EC in response to short tones (*t*(109) = 6.206, *p* < .001), as well as in response to long tones (*t*(109) = 7.512, *p* < .001). Interestingly, this analysis revealed a significant interaction between *pair duration* and *tone duration* (*F*(1,109) = 20.665, *p* < .001, *η2* = .159). Planned contrasts showed that participants gazed longer in response to long tones compared to short tones in both pair duration conditions (*p* < .001). Importantly, we observed that participants gazed significantly longer in response to short tones when their partner heard a long tone (*t*(109) = 4.305, *p* < .001), and gazed for less time in response to long tones when the other participant heard a short tone (*t*(109) = 2.251, *p* = .026). These findings reveal that the participants’ behaviour was dependent on what their partner was doing.

To ensure that participants were interacting during eye-contact, we tested the correlation between their tone-reproduction durations on trials where both partners were presented with long and short tones in each condition (EC vs. CTL) separately. Four pairs who had less than 5 trials were excluded from this analysis (n = 51 pairs). In order to test whether the correlation between the intervals estimated between the pairs was higher than chance, we compared the correlation coefficients for each pair in each condition (EC and CTL) against the average correlation coefficient of the same data with their trials shuffled randomly for 1000 iterations. The shuffling was applied within each pair respecting whether they were short or long (so the order of P1 and P2 trials were shuffled independently within each category – short and long). We entered the correlation coefficients in a 2 (*task: EC vs. CTL)* x 2 (*data: real vs. shuffled)* within-subjects ANOVA. The permutation analysis revealed a significant difference in the correlation between the tone-reproduction durations in both tasks vs. a shuffled distribution with a 1000 iterations (*F*(1,50) = 211.280, *p* < .001, *partial η2* = .809). There was a significant effect of task with higher correlations during eye-contact compared to the control task (*F*(1,50) = 5.452, *p* = .024, *η2* = .098). Importantly, there was a significant interaction between *task* and *data* (*F*(1,50) = 5.627, *p* = .022, *η2* = .101), the correlations were higher during eye-contact compared to control (*t*(50) = 2.346, *p =* .022) and compared to the correlations on the shuffled data (*t*(50) = 14.675, *p <* .001). However, the correlation was also significantly higher during the control task compared to the shuffled data (*t*(50) = 10.260, *p <* .001), evidencing that there is also a good level of behavioural synchronization in the control task (it is important to notice that the participants could still see each other and that one of them could see when the other have finished their time estimation).

**Fig. 2 –** **A.** Mean tone-reproduction duration (secs) for all pairs, separately for short (left) and long tones (right) during eye contact (EC; blue) vs. control (CTL; red), and for the same duration tones (opaque) compared to different duration tones (transparent); **B.** Average correlations (Spearman’s rho) between the tone-reproduction durations of the pairs during eye-contact trials (EC), control trials (CTL) and shuffled trials in the EC and CTL. Error bars represent ±1 *SEM*.

***Behavioural Analysis S2***

We investigated the nature of the interactions during eye contact by measuring how often one participant gazed down first in the pair. If a participant is being led by the other, they would gaze down after seeing their partner gaze down. If there is no “leading” behaviour, we would observe no such association, with one participant gazing down first approximately 50% of the time. To investigate how leadership roles emerged during the eye-contact task, we identified which participant was the *leader* and which one was the *follower* within each pair. Specifically, in each trial, the person who broke eye contact from their partner was considered the leader. We divided the number of trials P1 broke eye contact first compared to the total number of trials. The resulted values spanned from 0 (P2 leads) to 1 (P1 leads). Values around 0.5 meant the absence of a leader (P1 and P2 broke eye-contact in an approximately equal number of trials). As values around both extremes are indicative of strong leadership (e.g., 0.2 signifies the same leadership strength as 0.8; in the first case P2 is the leader, whereas in the second case P1 is the leader), we subtracted all values that were lower than 0.5 from 1. This resulted in values ranging from 0.5 to 1, with higher values indicating stronger leadership pattern. We only examined trials when both participants heard tones with the same duration (both short or both long).

The results showed that for some pairs, one of the participants consistently gazed down first (Fig.S2). In order to ensure that the differences in gazing down did not derive simply from individual differences in time estimation, we compared the leadership strength between participants during eye-contact vs. the same data but with a shuffled order (respecting the participant’s position). This way, if a participant consistently gazes down first, shuffling the order of the trials would not make a difference to how many times this participant gazes down first when trying to estimate the same duration. We conducted a repeated-measures ANOVA to compare the leadership strength between the eye-contact task, control task and shuffled ordered data (RDM). We observed a significant main effect (*F*(2,110) = 4.984, *p =* .008, *partial η2* = .083). The leadership strength eye-contact (EC) trials were significantly higher than in shuffled trials, showing that leadership in this task does not solely rely on individual differences in time estimation (*t*(55) = 4.081, *p <* .001). The leadership strength during the control task was marginally higher than the shuffled data (*t*(55) = 1.728, *p =* .090), which makes sense as the participants only had partial access to their partner’s eye-movements.

It is important to note that some participants did not present a clear leadership pattern, with values close to chance levels compared to the random distribution (Fig.S2B). The results from the random distribution show that the chance levels are not 50%, which is probably due to some overlap in their estimations as we shuffled keeping the same participant pair (only the order of the trials was shuffled). Because of this, we split the groups using a median split (median leadership strength = 0.65), which resulted in 27 pairs of participants with what we called a “weak leadership” vs. 29 with a “strong leadership” (>0.65). One pair only presented exactly the same number of trials in which each member gazed down first (50% leadership strength). Because we could not identify a leader and a follower, this pair was excluded from the directed connectivity analysis.

**Fig.S2.** Leadership Strength. **A.** Mean leadership strength during eye-contact, control task and on the shuffled data (shuffled order per pair). **B.** Violin plots showing the distribution of the leadership strength during eye-contact (EC) and in the shuffled trials (RDM). The results showed that the chance levels are above 0.5, suggesting some effect of individual differences on time perception. *** *p < .*001.

***Network Analysis S3***

We analysed the topography of the interbrain network as well as the ROI based statistics for degrees and global efficiency of each ROI. The topography of the averaged interbrain networks can be visualised on Fig.S3A. It is possible to see a higher number of edges between the right regions of the two participants (this figure only displays interbrain connections (for example, a link between F4 and F8 would mean a connection from one participant’s F4 to the other participant’s F8).

For the whole network analysis, we averaged the degree (i.e. number of edges) and global efficiency of the network nodes (see Methods) between channels for each ROI (MP: mid posterior; MF: mid frontal, RTP: right temporo-parietal, LTP: left temporo-parietal, RF: right frontal, LF: left frontal). For connectivity degree, we observed a main effect for *ROIs* (*F*(5,602) = 37.247,  *p*  < .001, *partial η2* = .302) and a main effect of *friendship* (*F*(1,86) = 9.382,  *p*  = .003, *partial η2* = .098), but no interaction between them (*F*(5,602) =.600,  *p*  = .756, *partial η2* = .007). Pairwise comparisons between ROIs showed that the midline areas (frontal and posterior) and the right parietal region showed higher degree than the other regions (*p < .*001). Midline frontal (MF) and posterior (MP) presented a higher degree compared to other regions (*p < .*001), but they did not differ from each other (*p* < .121). On Fig.S3B, the detailed contrasts are represented in the figure. It is clear that friends showed higher degree in all the ROIs, but that between the ROIs, the midline and right parietal regions were the most connected.

We did the same analysis for the global efficiency, here calculated in the level of each node (i.e., the more access a node has to the network, the higher the global efficiency). Similar to what we found in relation to the degrees, we observed a main effect for *ROIs* (*F*(5,602) = 32.606,  *p*  < .001, *partial η2* = .275) and a main effect of *friendship* (*F*(1,86) = 9.303,  *p*  = .003, *partial η2* = .098), but no interaction between them (*F*(5,602) =1.044,  *p*  = .399, *partial η2* = .012). This suggests that the topography of the networks during eye contact was similar to friends and strangers, but that friends showed a substantially more efficient.

**Fig.S3.** Interbrain connections during eye-contact. **A.** The edges represent connections above 2SD of the mean baseline (control task) for *friends* (no edge survived this threshold in the strangers’ group). **B.** Degree (top) and global efficacy of all connections (inter and intrabrain) of friends (dark blue) and strangers (light blue). The contrasts show the differences in the average degree and global efficacy between ROIs (top contrast lines) and between friends and strangers (lower contrast lines). Regions are: Midposterior (MP), Midfrontal (MF), right parietal (RP), left parietal (LP), right centro-temporal (RCT), left centro-temporal (LCT), right frontal (RF) and left frontal (LF). **C.** Examining all participant pairs who presented a rich club structure, we calculated the proportion who showed a connectivity higher than K (see Methods) for each channel. Channel Pz was the most frequent rich club, followed by midcentral and right parietal channels. Error bars represent ±1 *SEM*. *** *p* < .001/** *p <* 0.01/ * *p* < .05.

***Network Analysis S4***

In order to evaluate whether eye-contact was associated with higher changes in inter vs. intrabrain synchronization, we compared the network’s average strength and density between them using a 2 (*inter vs. intra brain)* x 2 (*leadership strength: strong vs. weak*) mixed-design ANOVA on the absolute average z-scores. For the network strength, we observed that *interbrain* connections increased significantly more than *intrabrain* connections during eye-contact (*F*(1,96) = 12.252,  *p*  < .001, *partial η2* = .113), but no interaction with nor main effect of *leadership strength* (*p* > .2). We observed the same effects for density, with a significantly higher proportion of interbrain connections compared to intra during eye-contact (*F*(1,96) = 23.276,  *p*  < .001, *partial η2* = .195), but no main effect of *leadership strength* nor interaction (*p* > .1). This demonstrates that eye-contact was associated with higher increase in interbrain connectivity compared to intrabrain during eye-contact, independently of the leadership strength (FigS4).


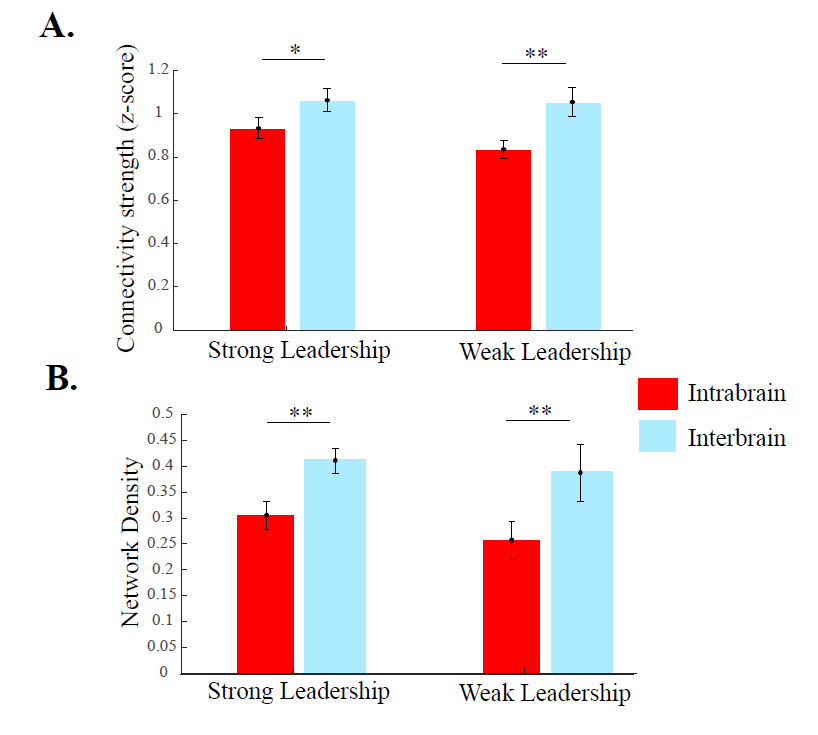


**Fig.S4.** Intra and interbrainchanges in directed connectivity (PSI) during eye-to-eye. **A.** Absolute strength of the intra (red) and interbrain (light blue) connections during eye contact. The strength is the absolute z-score against the control task. **B.** Network density (proportion of edges) for intrabrain (red) and interbrain (light blue) connections (unsigned) in pairs with strong vs. weak leadership.
